# Supplementary material
Source: PubMed Central journal article supplement (PMC4420719)
Supplement: NIHMS640396-supplement-1.pdf [file NIHMS640396-supplement-1.pdf]

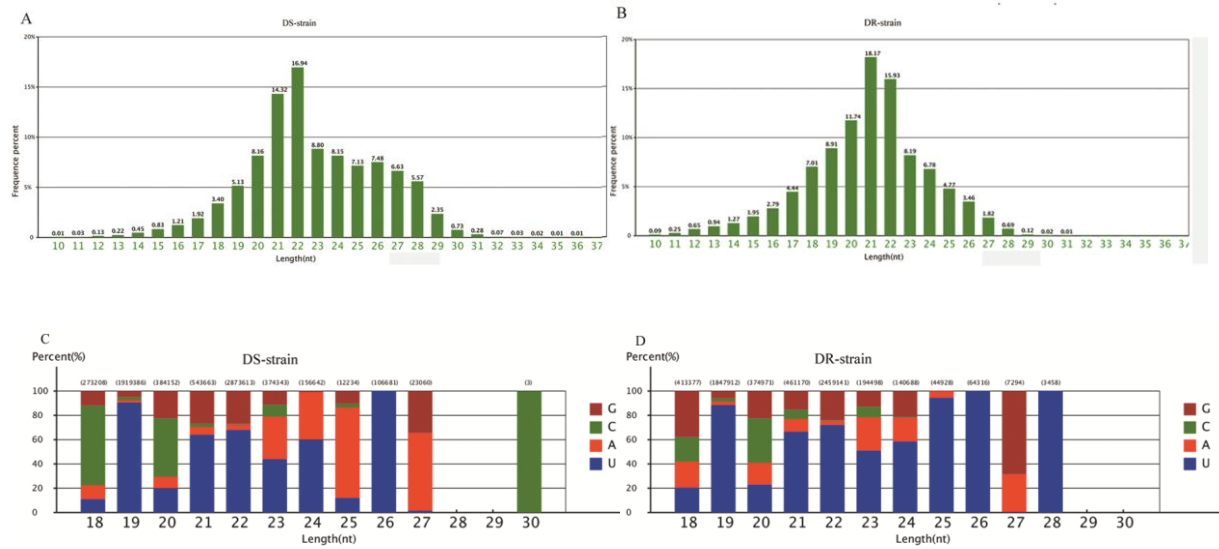

**Supplementary Figure 1.** Analysis of small RNAs. The length distribution in the DS-strain (A) and DR-strain (B). Analysis of the first nucleotide in small RNA sequences from the DS-strain (C) and DR-strain (D).
