# Supplementary material
Source: PubMed Central journal article supplement (PMC4420719)
Supplement: NIHMS640396-supplement-2.pdf [file NIHMS640396-supplement-2.pdf]

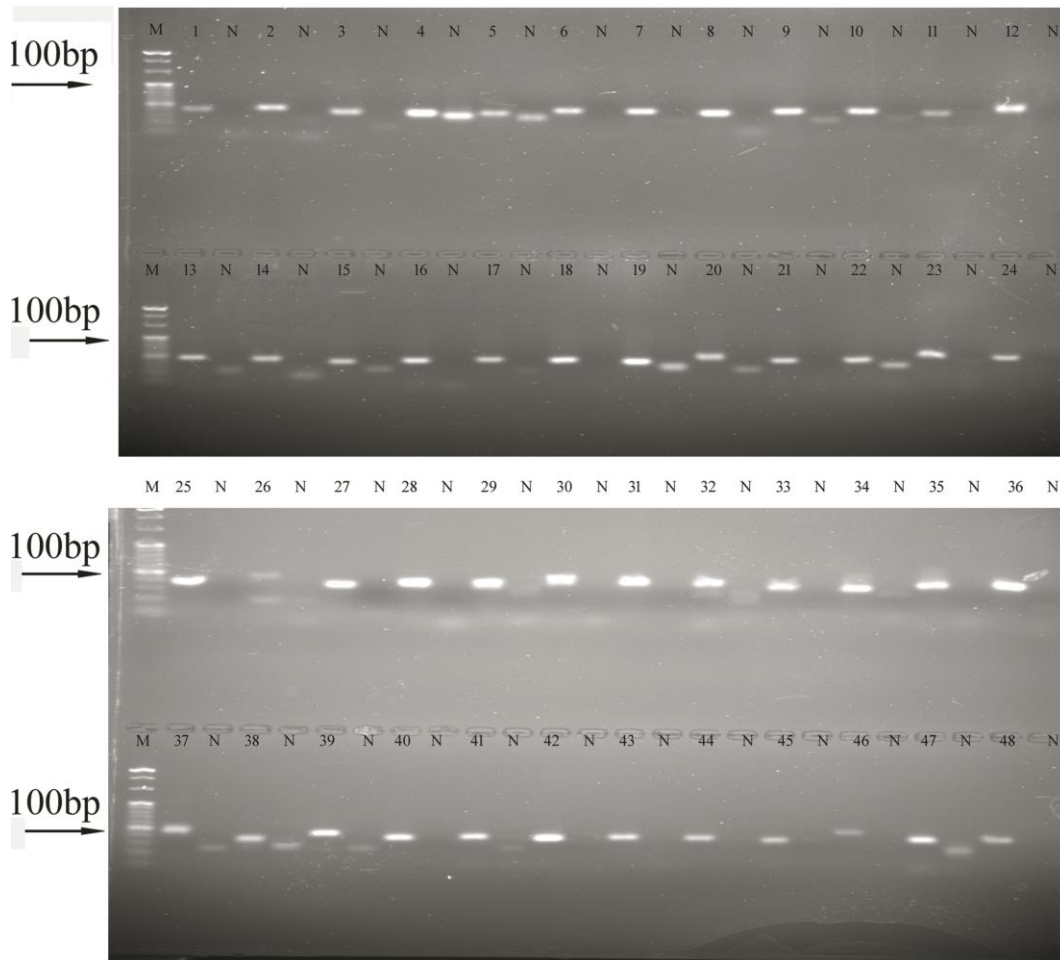

**Supplementary Figure 2.** PCR analysis of the miRNAs precursors in *Culex pipiens*. Agarose gel electrophoresis of 48 miRNAs precursors. M: Marker 2000. 1-48: PCR product of the 48 miRNAs precursors. N: PCR control, control reaction system: forward primer, reverse primer and enzyme.
