# Supplementary material
Source: PubMed Central journal article supplement (PMC4420719)
Supplement: NIHMS640396-supplement-3.pdf [file NIHMS640396-supplement-3.pdf]

**Supplementary Table 1 Primers for 36 conserved miRNAs and 12 candidate miRNAs**

| <b>miRNA</b>     | <b>sequence(5' to 3')</b>                               |
|------------------|---------------------------------------------------------|
| cpp-miR-9        | TGTCAAAGTTCTCTTTGGTTATCTA<br>GGTCAATTATTAAC TTCGGTATGC  |
| cpp-miR-993      | TCCGTGACCTACCCTGTAGT<br>ACCCTGTGAGATACCTCTATAGAA        |
| cpp-miR-iab-4    | TGCTTCATGAACGTATACTGAAG<br>CGCCTCCTGTTACGTATACTGA       |
| cpp-miR-11-3p    | GAAGCGCCAAGCAAGA ACTCAGACT<br>GAGAACTCCGGCTGTGACCTGTGT  |
| cpp-miR-252      | GAATTC TTTACTAAGTACTAGTGCC<br>TGGA ACTCTTCGATAAGCAC     |
| cpp-miR-996      | ATTTTCGTCGGCGTGCA<br>AACTTCATAGACGAGCATGTAATCT          |
| cpp-miR-276-3p   | TTCACCCACTAGCGAGGTATAGAGT<br>AAGCCATCCAAGAGCACGGTAT     |
| cpp-miR-275      | TCCGATAGCGCGCGCTAAGC<br>TCCGATCACGCGCGCTACTTC           |
| cpp-miR-989-3p   | TCATGGGGAAACGCCGCTA<br>CCAAGGGAAAGGTACCACTACGTCAC       |
| cpp-miR-13       | GCTGTTCAGTTCGTAAAAATGGTTG<br>CACAGGTTCAA ACTCGTCAA AATG |
| cpp-miR-3781     | AAGAGTGAAGAAGTGATTGATCG<br>ATGATGAATTAGTAGCTTGATGTAC    |
| cpp-miR-2796-3p  | GATGAATATAACGCCACCAGAAGCA<br>ATCCCGCAA AACATCCGGATC     |
| cpp-miR-10-3p    | GTTCTACATCTACCCTGTAGATCCG<br>TGCCCCACACAAACCTCTCTA      |
| cpp-miR-276-3p-1 | TTCACCCGCTAGCGAGGTATAG<br>AAGCCATCCAAGAGCACGGT          |
| cpp-miR-276-3p-2 | GATTGCCATCAGCGAGGTATAG<br>CGGCTAGCCAAGAGCACG            |
| cpp-miR-2944b    | GACGAAGGTAGAAGGAACTCC<br>GTTAAAAGTATCAGGTA ACTACTGC     |
| cpp-miR-493-3p   | CGTGGCGCCTCCTGTAACG<br>ATGGACCTGACCGGCACACA             |
| cpp-miR-993      | GTCACCCGCAGGGACGCG<br>TCGCCCTCAAAGACACAGTCTTACA         |
| cpp-miR-2779     | TGAAGGTGACTTCATCCGGTTCG<br>TGTTGGGACCTACCAACGGAACC      |
| cpp-miR-998      | CAATTC CGGGACTGAACTCTCG<br>ACCAGCACCGGAGCTGAATCT        |
| cpp-miR-278-3p   | TGGTCTTGGTGCGGACGGA<br>TGGCGGTTACAAACGGACGAA            |
| cpp-miR-307      | CCCGTCGATCACTCACTCAACCT                                 |

cpp-miR-137-3p TGCAAATCGCTCGCTCACTCA  
 TTGGTTGGCCACGCGTA  
 CACTTGTCAACTACGTGTATTCTCA  
 cpp-miR-252 GAATTCTTTACTAAGTACTAGTGCC  
 TGGA ACTCTTCGATAAGCAC  
 cpp-miR-279-3p CACTATTGTCGATGGGTGTGAAT  
 GCACTCTTGTTAATGAGTGTGGATC  
 cpp-miR-263 TTGTACACGTAATGGCACTGGAAGA  
 CCTTGTACCAGGGATGCCACTG  
 cpp-miR-2942 TTCGGCGGCCAACTTTATCA  
 CAAAACGGGAATTA ACTCGTGAAGT  
 cpp-miR-4448 GCTCGCACCACAACCCCG  
 AAGCGAGAATCATACCCCTAGACCA  
 cpp-miR-965-3p GGCAGATTCTGAAGGGGGAAATC  
 GCACACGCTGAATGGGAAAAGC  
 cpp-miR-316 TTGATTGATTTGTCTTTTTCCGCTT  
 ATTGATTGAGGCGCCTTTTTCTG  
 cpp-miR-210-3p ATCTCATTGCAGCTGCTGACCACTG  
 AATGCCCAATAGCCGTTGTCAC  
 cpp-miR-2941-3p AGGTGATCGTACCCGTGGTGTTTAG  
 GCGCCAATATCCGTGGAGTT  
 cpp-miR-2981 GATGTTGATACCGTCGGCCG  
 CACTACACCGCCGGTGGA  
 cpp-miR-2840 TGTGGTCTTCTTCCGGCCGAC  
 CGGGCCCGCCTCCTCCT  
 cpp-miR-285-3p GAATTCTTTACTAAGTACTAGTGCC  
 TGGA ACTCTTCGATAAGCAC  
 cpp-miR-71 TGGGTCTGCAGTGCTTTTCGT  
 CTGAAATCCCCTGCCAGTC  
 cpp-novel-miR1 TTTTACGGCCAGAGCTAATTGGAGA  
 CGCCACAACCAGACCTAATCAAAGA  
 cpp-novel-miR2 AACATTTACGGTGTCTGTACG  
 AGACGTGTCGGGGATCCTCAC  
 cpp-novel-miR3-3p CGAACTGCAGTTGATTCGGGACG  
 TCAACCGCCGTCAGCCGC  
 cpp-novel-miR5 CTGCCCCGATCAATTAGAAATCACAC  
 GCGCTCAATCCATTGGAAATCA  
 cpp-novel-miR6-3p AGACGAGAAAGCAACTGCCGC  
 TGTCCAGAAACATTGGCCAATCT  
 cpp-novel-miR7-3p TTAAGCAACATCGGGCGCGATTA  
 AATAGCAAAAATGCCAACGACACGC  
 cpp-novel-miR8-3p TTTCTGTCATGTTGAGGAGTTAAT  
 TTATCATCATGTACCAGAGTTAATG  
 cpp-novel-miR9 CAGTTAACTCAATCGGAATTCTAA  
 CCAGTCAACTCAATCGGAATT

|                    |                            |
|--------------------|----------------------------|
| cpp-novel-miR10    | TTGAAGTTTCTGATCTTGTATTTTG  |
|                    | TTGAGCCTTTTGAACCTTGTATCT   |
| cpp-novel-miR11-3p | TTTCGATCCCCAAACCGTGTTG     |
|                    | TACCGACCCCAAACCGTGTTG      |
| cpp-novel-miR12    | TTTTTCCTCCTGGTGTTCACCTGCCG |
|                    | GTCCGCTCTTGGCATTACCG       |
| cpp-novel-miR13    | CATTTCGGCGTTAGTTTTGG       |
|                    | CCACCGCCAGCCTCAGTT         |

---

The top sequence in each pair is the forward primer and the bottom sequence is the reverse primer.
