# Supplementary material
Source: PubMed Central journal article supplement (PMC4420719)
Supplement: NIHMS640396-supplement-4.pdf [file NIHMS640396-supplement-4.pdf]

Supplementary Table 2 Primers for the Stem-loop quantitative RT-PCR

| miRNA          | Sequence(5' to 3')                                                                |
|----------------|-----------------------------------------------------------------------------------|
| cpp-miR-2-3p   | CTCAACTGGTGTCTGGAGTCGGCAATTCAGTTGAGTGCTCATC<br>ACACTCCAGCTGGGTACAGCCAGCTTTGA      |
| cpp-miR-13     | CTCAACTGGTGTCTGGAGTCGGCAATTCAGTTGAGAACTCGTC<br>ACACTCCAGCTGGGTATCACAGCCATTTTGA    |
| cpp-miR-92a    | CTCAACTGGTGTCTGGAGTCGGCAATTCAGTTGAGATAGGCCG<br>ACACTCCAGCTGGGTATTGCACTTGTCCCG     |
| cpp-miR-285-3p | CTCAACTGGTGTCTGGAGTCGGCAATTCAGTTGAGGTAAGTATGAT<br>ACACTCCAGCTGGGTAGCACCATTTCGAAAT |
| cpp-miR-3781   | CTCAACTGGTGTCTGGAGTCGGCAATTCAGTTGAGATCACGCT<br>ACACTCCAGCTGGGAAGTGATTGATCGTGAG    |
| cpp-miR-4448   | CTCAACTGGTGTCTGGAGTCGGCAATTCAGTTGAGCATACCCC<br>ACACTCCAGCTGGGGGCTCGATGGTCTAGG     |
| cpp-miR-309-3p | CTCAACTGGTGTCTGGAGTCGGCAATTCAGTTGAGGCGACAAA<br>ACACTCCAGCTGGGTCACTGGGCATAGTT      |
| cpp-miR-965-3p | CTCAACTGGTGTCTGGAGTCGGCAATTCAGTTGAGAATGGGAA<br>ACACTCCAGCTGGGTAAGCGTATAGCTTTT     |
| cpp-miR-2840   | CTCAACTGGTGTCTGGAGTCGGCAATTCAGTTGAGTCCTCCTC<br>ACACTCCAGCTGGGAGGAACTGGAACGAGGA    |
| cpp-miR-1-3p   | CTCAACTGGTGTCTGGAGTCGGCAATTCAGTTGAGCTCCATAC<br>ACACTCCAGCTGGGTGGAATGTAAAGAAGT     |
| cpp-miR-184-3p | CTCAACTGGTGTCTGGAGTCGGCAATTCAGTTGAGGCCCTTAT<br>ACACTCCAGCTGGGTGGACGGAGAACTGAT     |
| cpp-miR-71     | CTCAACTGGTGTCTGGAGTCGGCAATTCAGTTGAGATCTCACT<br>ACACTCCAGCTGGGAGAAAGACATGGGTAG     |
| cpp-novel-miR7 | CTCAACTGGTGTCTGGAGTCGGCAATTCAGTTGAGATCGGAAC<br>ACACTCCAGCTGGGACATCGCGTGTCTGT      |

The top sequence of each primer pair is the RT primer sequence. The bottom sequence is the forward primer used for qPCR. The universal reverse primers used in this study were URP: **TGGTGTCTGGAGTCG**. *U6*: **F:GCTTCGGCTGGACATATACTAAAAT**  
**R:GAACGCTTCACGATTTTGC**.
