# Supplementary material
Source: PubMed Central journal article supplement (PMC4420719)
Supplement: NIHMS640396-supplement-5.pdf [file NIHMS640396-supplement-5.pdf]

**Supplementary Table 3 The sequence of miRNA mimic and negative control of cpp-miR-71**

Sequence (5' to 3')

---

|        |                                                    |
|--------|----------------------------------------------------|
| miR-71 | AGAAAGACAUGGGUAGUGAGAU<br>CUCACUACCCAUGUCUUUCUUU   |
| N.C    | GCGACGAUCUGCCUAAGAUdTdT<br>AUCUUAGGCAGAUCGUCGCdTdT |

---

The mimics are double stranded RNAs.
