# Supplementary material
Source: PubMed Central journal article supplement (PMC4420719)
Supplement: NIHMS640396-supplement-6.pdf [file NIHMS640396-supplement-6.pdf]

**Supplementary Table 4 The sequence of siCYP325BG3 and negative control of siCYP325BG3**

| Sequence (5' to 3') |                                                |
|---------------------|------------------------------------------------|
| siCYP325BG3         | CCGGAAAUCGCUCAACAAATT<br>UUUGUUGAGCGAUUCCGGTT  |
| N.C                 | UUCUCCGAACGUGUCACGUTT<br>ACGUGACACGUUCGGAGAATT |
